# Supplementary material
Source: publisher site journal article supplement (https://www.spandidos-publications.com/3406/downloadSupplementary)
Supplement: Supplementary file 1 [file downloadSupplementary]

## Sheet: Table SIV
Table SIV. Top 40 downregulated miRNAs in GSE19945 (filtration citeria, P-value <0.05 and |LogFC| ≥1.2).
ID	adj.P.Val	P-Value	t	B	logFC	miRNA_ID
A_25_P00013422	0.000157	2.61e-06	-5.58071	4.6476	-3.72669	hsa-miR-144*
A_25_P00010827	8.83e-06	1.03e-07	-6.6404	7.7518	-3.70148	hsa-miR-30a*
A_25_P00012189	0.000183	3.65e-06	-5.4717	4.3274	-3.60834	hsa-miR-144
A_25_P00012150	0.00136	6.03e-05	-4.54876	1.6452	-3.58373	hsa-miR-1
A_25_P00012396	1.11e-06	3.71e-09	-7.75571	10.9372	-3.55117	hsa-miR-338-3p
A_25_P00012216	1.6e-06	8.01e-09	-7.49367	10.2001	-3.4626	hsa-miR-126
A_25_P00012446	0.00023	4.99e-06	-5.3696	4.0278	-3.33606	hsa-miR-451
A_25_P00010600	8.83e-06	8.97e-08	-6.68617	7.8847	-3.29898	hsa-miR-126*
A_25_P00013852	8.83e-06	1.02e-07	-6.64436	7.7633	-3.01276	hsa-miR-30a
A_25_P00014063	0.00157	7.84e-05	-4.46117	1.3955	-2.86376	hsa-miR-486-5p
A_25_P00012193	0.000872	3.34e-05	-4.74481	2.2081	-2.71649	hsa-miR-145
A_25_P00010769	0.000403	1.23e-05	-5.07313	3.1606	-2.63754	hsa-miR-195
A_25_P00014866	0.000572	1.91e-05	-4.92984	2.7437	-2.57293	hsa-miR-497
A_25_P00013427	0.000316	7.89e-06	-5.21954	3.5883	-2.56424	hsa-miR-145*
A_25_P00012071	0.00101	4.06e-05	-4.68073	2.0236	-2.56196	hsa-miR-139-5p
A_25_P00012183	0.00152	7.33e-05	-4.4835	1.4591	-2.54643	hsa-miR-143
A_25_P00010210	0.0023	0.000119	-4.32173	1.0007	-2.49492	hsa-miR-218
A_25_P00014894	0.0431	0.00524	-2.97439	-2.5471	-2.18915	hsa-miR-551b
A_25_P00013287	0.000403	1.16e-05	-5.09299	3.2186	-2.04448	hsa-miR-30c-2*
A_25_P00010172	0.00615	0.00039	-3.91618	-0.125	-2.03482	hsa-miR-521
A_25_P00010390	0.00136	6.34e-05	-4.53198	1.5973	-1.99083	hsa-miR-30b
A_25_P00012576	0.00136	6.16e-05	-4.54186	1.6255	-1.94359	hsa-miR-517a
A_25_P00010472	0.0567	0.00784	-2.81765	-2.9147	-1.84899	hsa-miR-99a
A_25_P00010474	0.0429	0.00515	-2.98108	-2.5312	-1.76294	hsa-miR-100
A_25_P00015352	0.0148	0.00131	-3.48885	-1.2637	-1.74656	hsa-miR-517c
A_25_P00012611	0.00767	0.00055	-3.79648	-0.4495	-1.72913	hsa-miR-522
A_25_P00012274	0.0104	0.00084	-3.6477	-0.8471	-1.69715	hsa-miR-29c
A_25_P00013418	0.0104	0.000853	-3.64218	-0.8617	-1.68123	hsa-miR-143*
A_25_P00010607	0.00517	0.000293	-4.01477	0.1451	-1.6251	hsa-miR-140-5p
A_25_P00012177	0.0079	0.000603	-3.76414	-0.5365	-1.57935	hsa-miR-140-3p
A_25_P00010402	0.006	0.00037	-3.93424	-0.0757	-1.57851	hsa-miR-638
A_25_P00013893	0.0676	0.0105	-2.70348	-3.1746	-1.55493	hsa-miR-199b-5p
A_25_P00011097	0.038633	0.00393	-3.08456	-2.2818	-1.54323	hsa-miR-572
A_25_P00010981	0.038733	0.00404	-3.07365	-2.3083	-1.53747	hsa-miR-135a
A_25_P00015296	0.007896	0.000597	-3.76778	-0.5267	-1.52961	hsa-miR-30d
A_25_P00012130	0.038733	0.00416	-3.06239	-2.3356	-1.49337	hsa-miR-223
A_25_P00012002	0.007439	0.000519	-3.81704	-0.3941	-1.47438	hsa-miR-26b
A_25_P00013883	0.007439	0.000521	-3.81555	-0.3981	-1.474	hsa-miR-30c
A_25_P00010980	0.061143	0.00897	-2.76468	-3.0362	-1.47375	hsa-miR-125b
A_25_P00010687	0.011313	0.000943	-3.60663	-0.9556	-1.4454	hsa-miR-498
